# Supplementary material for: Dietary Zinc Intake and All-Cause and Cardiovascular Mortality in Korean Middle-Aged and Older Adults
Source: MDPI journal article supplement (doi:10.3390/nu15020358), 2023-01-11
Supplement: s1 [file s1]

## **Supplementary materials**

### **Dietary zinc intake and all-cause and cardiovascular mortality in Korean middle-aged and older adults**

#### **Short title: Dietary zinc intake and mortality**

Yu-Jin Kwon,MD,Ph.D<sup>1†</sup>; Hye Sun Lee,Ph.D<sup>12†</sup>; Goeun Park, Ph.D<sup>3</sup>; Juyeon Yang, M.S<sup>2</sup>; Hyung-Mi Kim,Ph.D<sup>14</sup>; Ji-Won Lee MD,Ph.D<sup>5</sup>

<sup>1</sup>Department of Family Medicine, Yongin Severance Hospital, Yonsei University College of Medicine, Gyeonggi, Republic of Korea

<sup>2</sup>Biostatistics Collaboration Unit, Department of Research Affairs, Yonsei University College of Medicine, Seoul, Republic of Korea

<sup>3</sup>Biomedical statistics center, Research institute for future medicine, Samsung medical center

<sup>4</sup>Department of Food and Nutrition, Dongduk Women's University, Seoul 02748, Korea

<sup>5</sup>Department of Family Medicine, Severance Hospital, Yonsei University College of Medicine, Seoul, Republic of Korea

<sup>†</sup>These authors have contributed equally to this work and share first authorship

#### **Corresponding author**

Ji-Won Lee, M.D., Ph.D.

Department of Family Medicine, Yonsei University College of Medicine, Severance Hospital, Yonsei-ro 50-1, Seodaemun-gu, Seoul, Republic of Korea, 03722

Tel: +82 2 2019 3480,

Fax: +82 3462 8209,

E-mail: indi5645@yuhs.ac

**Table S1. Baseline characteristics of study population according to zinc intake (mg/day) –**

| <b>Variables</b>                     | <b>≤5.60</b>  | <b>5.60–7.98</b> | <b>&gt;7.98</b> | <b><i>p</i>-value</b> |
|--------------------------------------|---------------|------------------|-----------------|-----------------------|
| N                                    | 32,992        | 55,029           | 55,029          |                       |
| Sex (men)                            | 8947 (27.1)   | 19,528 (35.5)    | 22,469 (40.8)   | <.001                 |
| Age (years)                          | 55.6±9.3      | 53.9±8.6         | 52.7±8.3        | <.001                 |
| Body mass index (kg/m <sup>2</sup> ) | 23.8±3.0      | 24.0±2.9         | 24.1±2.9        | <.001                 |
| WC (cm)                              | 80.7±8.9      | 81.3±8.7         | 81.7±8.8        | <.001                 |
| SBP (mmHg)                           | 122.9±16.1    | 122.8±15.4       | 122.3±15.0      | <.001                 |
| DBP (mmHg)                           | 76.2±10.2     | 76.2±10.1        | 76.3±9.9        | .171                  |
| Glucose (mg/dl)                      | 95.5±21.4     | 95.6±21.2        | 95.7±21.5       | .721                  |
| HbA1c (%)                            | 5.7±0.8       | 5.7±0.7          | 5.7±0.7         | .647                  |
| TC (mg/dL)                           | 197.7±36.3    | 196.8±35.6       | 197.8±35.4      | <.001                 |
| HDL-C (mg/dL)                        | 52.2±13.2     | 52.5±13.0        | 53.0±13.0       | <.001                 |
| Triglycerides (mg/dL)                | 129.2±88.4    | 128.9±90.4       | 130.1±92.8      | .081                  |
| Smoking status, n (%)                |               |                  |                 | <.001                 |
| Never smoker                         | 25,499 (77.3) | 39,813 (72.4)    | 37,475 (68.1)   |                       |
| Former smoker                        | 3856(11.7)    | 8506(15.5)       | 9523(17.3)      |                       |
| Current smoker                       | 3637(11.0)    | 6710(12.2)       | 8031(14.6)      |                       |
| Alcohol intake, n (%)                |               |                  |                 | <.001                 |
| Never drinker                        | 18,824 (57.1) | 28,400 (51.6)    | 25,148 (45.7)   |                       |
| Former drinker                       | 1476 (4.5)    | 2186 (4.0)       | 2123 (3.9)      |                       |
| Current drinker                      | 12,692 (38.5) | 24,443 (44.4)    | 27,758 (50.4)   |                       |
| Regular exercise (Yes)               | 13,828 (41.9) | 27,293 (49.6)    | 30,608 (55.6)   | <.001                 |
| Hypertension, n (%)                  | 6051(18.3)    | 9490 (17.3)      | 8866 (16.1)     | <.001                 |
| Diabetes, n (%)                      | 2368 (7.2)    | 4069 (7.4)       | 3927(7.1)       | 0.221                 |
| Dyslipidemia, n (%)                  | 18,824 (57.1) | 30,904 (56.2)    | 31,491(57.2)    | .001                  |
| CKD, n (%)                           | 1394 (4.2)    | 1425 (2.6)       | 1073 (2.0)      | <.001                 |
| Residential area, n (%)              |               |                  |                 | <.001                 |
| Urban                                | 25,976 (78.7) | 47,960 (87.2)    | 50,420 (91.6)   |                       |
| Rural                                | 7016 (21.3)   | 7069 (12.9)      | 4609 (8.4)      |                       |
| Total energy (kcal/day)              | 1172.9±245.0  | 1617.9±231.8     | 2191.0±512.6    | <.001                 |
| Carbohydrate (g/day)                 | 222.5±54.4    | 297.8±52.2       | 373.8±87.4      | <.001                 |
| Fat (g/day)                          | 14.0±6.6      | 22.4±8.3         | 40.3±19.3       | <.001                 |
| Protein (g/day)                      | 34.7±7.5      | 51.1±8.3         | 80.1±25.4       | <.001                 |
| Calcium (mg/day)                     | 243.2±118.1   | 375.2±146.5      | 617.1±293.7     | <.001                 |
| Phosphorus (mg/day)                  | 542.2±123.0   | 784.6±135.6      | 1182.7±350.0    | <.001                 |
| Iron (mg/day)                        | 5.7±1.8       | 8.5±2.2          | 13.7±5.4        | <.001                 |

CKD, chronic kidney disease; WC, waist circumference; SBP, systolic blood pressure; DBP, diastolic blood pressure; HbA1C, glycated hemoglobin; HDL-C, high-density lipoprotein cholesterol; TC, total cholesterol

**Table S2. Baseline characteristics of study population according to zinc intake in men**

| Variables                            | ≤5.60        | 5.60–7.23     | >7.23         | <i>p</i> -value |
|--------------------------------------|--------------|---------------|---------------|-----------------|
| N                                    | 8943         | 13,500        | 28,501        |                 |
| Age (years)                          | 57.0±9.6     | 55.3±9.0      | 53.8±8.8      | <.001           |
| Body mass index (kg/m <sup>2</sup> ) | 24.0±2.8     | 24.2±2.7      | 24.6±2.8      | <.001           |
| WC (cm)                              | 84.9±7.8     | 85.4±7.5      | 86.2±7.6      | <.001           |
| SBP (mmHg)                           | 125.7±15.6   | 125.6±14.8    | 125.5±14.4    | .581            |
| DBP (mmHg)                           | 78.6±10.2    | 78.5±9.9      | 78.7±9.8      | .018            |
| Glucose (mg/dl)                      | 99.5±24.9    | 99.4±23.2     | 99.8±24.6     | .265            |
| HbA1c (%)                            | 5.77±0.81    | 5.78±0.83     | 5.77±0.84     | .838            |
| TC (mg/dL)                           | 191.4±35.7   | 192.2±34.9    | 194.0±34.7    | <.001           |
| HDL-C (mg/dL)                        | 47.9±12.2    | 48.4±12.0     | 48.8±11.9     | <.001           |
| Triglycerides(mg/dL)                 | 150.9±107.5  | 149.4±105.6   | 154.5±111.2   | <.001           |
| Smoking status, n (%)                |              |               |               | <.001           |
| Never smoker                         | 2538 (28.4)  | 3848 (28.5)   | 7670 (26.9)   |                 |
| Former smoker                        | 3476 (38.9)  | 5551 (41.1)   | 11,644 (40.9) |                 |
| Current smoker                       | 2929 (32.8)  | 4101 (30.4)   | 9187 (32.2)   |                 |
| Alcohol intake, n (%)                |              |               |               | <.001           |
| Never drinker                        | 2226 (24.9)  | 2954 (21.9)   | 5254 (18.4)   |                 |
| Former drinker                       | 894 (10.0)   | 1102 (8.2)    | 1903 (6.7)    |                 |
| Current drinker                      | 5823 (65.1)  | 9444 (70.0)   | 21,344 (74.9) |                 |
| Regular exercise (Yes)               | 3935 (44.0)  | 6982 (51.7)   | 16514 (57.9)  | <.001           |
| Hypertension, n (%)                  | 2042 (22.8)  | 2933 (21.7)   | 6000 (21.1)   | .001            |
| Diabetes, n (%)                      | 836 (9.4)    | 1360(10.1)    | 2872(10.1)    | .113            |
| Dyslipidemia, n (%)                  | 5131 (57.4)  | 7725(57.2)    | 17039(59.8)   | <.001           |
| CKD, n (%)                           | 364 (4.1)    | 403(3.0)      | 728(2.6)      | <.001           |
| Residential area, n (%)              |              |               |               | <.001           |
| Urban                                | 6871 (76.8)  | 11,412 (84.5) | 25,478 (89.4) |                 |
| Rural                                | 2072 (23.2)  | 2088 (15.5)   | 3023 (10.6)   |                 |
| Total energy (kcal/day)              | 1242.9±236.5 | 1592.7±200.5  | 2136.5±489.1  | <.001           |
| Carbohydrate (g/day)                 | 235.7±52.6   | 294.1±46.0    | 366.5±82.5    | <.001           |
| Fat (g/day)                          | 14.9±6.7     | 21.7±7.7      | 38.5±18.1     | <.001           |
| Protein (g/day)                      | 35.8±7.1     | 48.9±6.8      | 76.0±23.8     | <.001           |
| Calcium (mg/day)                     | 216.2±103.5  | 316.0±120.0   | 527.3±244.4   | <.001           |
| Phosphorus (mg/day)                  | 545.9±114.6  | 735.1±112.1   | 1101.2±317.9  | <.001           |
| Iron (mg/day)                        | 5.5±1.7      | 7.8±1.8       | 12.4±4.7      | <.001           |

*P*-values are derived from the independent *t*-test for continuous variables, and the chi-square test for categorical variables; significance was set at *p* < .05.

WC, waist circumference; SBP, systolic blood pressure; BP, diastolic blood pressure, TC, Total cholesterol; HDL-C, high-density lipoprotein cholesterol; HbA1c, glycated hemoglobin; CKD, chronic kidney disease

**Table S3. Baseline characteristics of study population according to zinc intake in women**

| Variables                            | ≤5.48        | 5.48-7.99    | >7.99        | <i>p</i> -value |
|--------------------------------------|--------------|--------------|--------------|-----------------|
| N                                    | 22,098       | 37,503       | 32,505       |                 |
| Age (years)                          | 55.2±9.2     | 53.4±8.3     | 52.1±7.9     | <.001           |
| Body mass index (kg/m <sup>2</sup> ) | 23.7±3.1     | 23.8±3.0     | 23.7±3.0     | .004            |
| WC (cm)                              | 79.1±8.7     | 79.0±8.4     | 78.6±8.2     | <.001           |
| SBP (mmHg)                           | 121.8±16.1   | 121.3±15.5   | 120.2±15.1   | <.001           |
| DBP (mmHg)                           | 75.2±10.0    | 74.9±9.9     | 74.6±9.7     | <.001           |
| Glucose (mg/dl)                      | 94.0±19.5    | 93.6±19.6    | 92.8±18.4    | .001            |
| HbA1c (%)                            | 5.70±0.73    | 5.69±0.70    | 5.67±0.66    | <.001           |
| TC (mg/dL)                           | 200.1±36.2   | 199.2±35.8   | 200.2±35.7   | <.001           |
| HDL-C (mg/dL)                        | 53.8±13.2    | 54.6±13.0    | 55.9±13.1    | <.001           |
| Triglycerides(mg/dL)                 | 121.2±79.1   | 117.1±77.1   | 113.0±72.5   | <.001           |
| Smoking status, n (%)                |              |              |              | <.001           |
| Never smoker                         | 21069(95.3)  | 36288(96.8)  | 31374(96.5)  |                 |
| Former smoker                        | 357(1.6)     | 441(1.2)     | 416(1.3)     |                 |
| Current smoker                       | 672(3.0)     | 774(2.1)     | 715(2.2)     |                 |
| Alcohol intake, n (%)                |              |              |              | <.001           |
| Never drinker                        | 15217(68.9)  | 25653(68.4)  | 21068(64.8)  |                 |
| Former drinker                       | 545(2.5)     | 702(1.9)     | 639(2.0)     |                 |
| Current drinker                      | 6336(28.7)   | 11148(29.7)  | 10798(33.2)  |                 |
| Regular exercise (Yes)               | 9068 (41.0)  | 17834 (47.6) | 17396 (53.5) | <.001           |
| Hypertension, n (%)                  | 3674(16.6)   | 5562(14.8)   | 4196(12.9)   | <.001           |
| Diabetes, n (%)                      | 1406(6.4)    | 2255(6.0)    | 1635(5.0)    | .001            |
| Dyslipidemia, n (%)                  | 12548(56.8)  | 20792(55.4)  | 17984(55.3)  | <.001           |
| CKD, n (%)                           | 968(4.4)     | 908(2.4)     | 521(1.6)     | <.001           |
| Residential area, n (%)              |              |              |              | <.001           |
| Urban                                | 17478(79.1)  | 32932(87.8)  | 30185(92.9)  |                 |
| Rural                                | 4620(20.9)   | 4571(12.2)   | 2320(7.1)    |                 |
| Total energy (kcal/day)              | 1127.1±238.3 | 1586.8±235.4 | 2164.9±520.1 | <.001           |
| Carbohydrate (g/day)                 | 214.0±53.4   | 293.2±53.6   | 370.7±88.9   | <.001           |
| Fat (g/day)                          | 13.4±6.4     | 21.6±8.2     | 39.4±19.6    | <.001           |
| Protein (g/day)                      | 33.7±7.4     | 50.4±8.5     | 79.5±26.0    | <.001           |
| Calcium (mg/day)                     | 248.2±119.6  | 390.5±151.5  | 654.5±312.8  | <.001           |
| Phosphorus (mg/day)                  | 530.9±122.9  | 783.2±140.5  | 1195.4±366.5 | <.001           |
| Iron (mg/day)                        | 5.9±1.8      | 8.6±2.3      | 14.0±5.7     | <.001           |

*P*-values are derived from the independent *t*-test for continuous variables, and the chi-square test for categorical variables; significance was set at *p* < .05.

WC, waist circumference; SBP, systolic blood pressure; BP, diastolic blood pressure, TC, Total cholesterol; HDL-C, high-density lipoprotein cholesterol; HbA1c, glycated hemoglobin; CKD, chronic kidney disease

**Table S4. Proportions of all-cause, cancer, and cardiovascular disease mortality according to the dietary zinc cutoff points**

|                     | Total           |         | Male            |         | Female          |         |
|---------------------|-----------------|---------|-----------------|---------|-----------------|---------|
|                     | Proportion (SD) | p-value | Proportion (SD) | p-value | Proportion (SD) | p-value |
| All-cause mortality |                 | <.0001  |                 | <.0001  |                 | <.0001  |
| ≤cut1               | 5.459 (0.125)   |         | 10.656 (0.326)  |         | 3.638 (0.126)   |         |
| cut1–cut2           | 3.629 (0.08)    |         | 6.533 (0.213)   |         | 2.197 (0.076)   |         |
| >cut2               | 2.977 (0.072)   |         | 5.154 (0.131)   |         | 1.551 (0.069)   |         |
| Cancer mortality    |                 | <.0001  |                 | <.0001  |                 | <.0001  |
| ≤cut1               | 2.07 (0.078)    |         | 3.983 (0.191)   |         | 1.237 (0.059)   |         |
| cut1–cut2           | 1.567 (0.043)   |         | 2.586 (0.094)   |         | 0.949 (0.046)   |         |
| >cut2               | 1.355 (0.073)   |         | 2.1 (0.131)     |         | 0.76 (0.078)    |         |
| CVD mortality       |                 | <.0001  |                 | <.0001  |                 | <.0001  |
| ≤cut1               | 1.209 (0.072)   |         | 1.908 (0.159)   |         | 0.947 (0.074)   |         |
| cut1–cut2           | 0.74 (0.038)    |         | 1.213 (0.089)   |         | 0.452 (0.033)   |         |
| >cut2               | 0.481 (0.026)   |         | 0.821 (0.053)   |         | 0.225 (0.026)   |         |

SD, standard deviation; CVD, cardiovascular disease; cut1; cut2
